# Supplementary material
Source: MDPI journal article supplement (https://www.mdpi.com/2073-4395/11/5/928)
Supplement: s1 [file s1]

**Table S1.** Pearson correlation (r) between physiological groups and dominant genera of microbial community.

| Physiological groups |                       | proteolytics |        | amylolytics |        | cellulolytics |        | ligninolytics |        | P-solubilizing |        | N2-fixing |        | nitrifiers I |        | nitrifiers II |        |
|----------------------|-----------------------|--------------|--------|-------------|--------|---------------|--------|---------------|--------|----------------|--------|-----------|--------|--------------|--------|---------------|--------|
|                      |                       | M            | T      | M           | T      | M             | T      | M             | T      | M              | T      | M         | T      | M            | T      | M             | T      |
|                      | <i>Thermomyces</i>    | 0.693        | 0.961  | 0.544       | 0.992  | 0.957         | 0.946  | -0.583        | -0.585 | -0.139         | -0.277 | 0.984     | 0.992  | -0.558       | -0.645 | -0.544        | -0.289 |
|                      | <i>Penicillium</i>    | -0.024       | -0.421 | -0.844      | -0.256 | -0.187        | -0.460 | -0.667        | -0.666 | 0.464          | 0.470  | -0.319    | -0.241 | 0.798        | 0.659  | -0.139        | 0.670  |
|                      | <i>Aspergillus</i>    | 0.203        | 0.095  | -0.538      | 0.268  | 0.273         | 0.058  | -0.999        | -0.999 | 0.190          | 0.135  | 0.212     | 0.289  | 0.406        | 0.287  | -0.381        | 0.571  |
|                      | <i>Byssochlamys</i>   | -0.389       | -0.246 | 0.419       | -0.412 | -0.440        | -0.198 | 1.000         | 1.000  | -0.279         | -0.187 | -0.353    | -0.428 | -0.332       | -0.186 | 0.448         | -0.454 |
|                      | <i>Bacillus</i>       | -0.796       | -0.475 | -0.487      | -0.376 | -0.441        | -0.475 | -0.104        | -0.101 | -0.002         | 0.236  | -0.425    | -0.357 | 0.575        | 0.596  | -0.059        | 0.288  |
|                      | <i>Aeribacillus</i>   | -0.454       | -0.144 | -0.310      | -0.221 | -0.309        | -0.276 | 0.865         | 0.866  | -0.230         | -0.165 | -0.280    | -0.231 | -0.009       | 0.271  | -0.083        | 0.594  |
|                      | <i>Caldibacillus</i>  | -0.425       | -0.440 | -0.400      | -0.256 | -0.282        | -0.334 | -0.084        | -0.082 | 0.128          | 0.433  | -0.302    | -0.241 | 0.735        | 0.338  | -0.338        | 0.055  |
|                      | <i>Thermobacillus</i> | 0.230        | 0.003  | -0.016      | -0.001 | 0.157         | -0.086 | -0.308        | -0.305 | 0.828          | 0.859  | -0.093    | -0.042 | 0.402        | 0.091  | -0.462        | -0.179 |
|                      | <i>Streptomyces</i>   | -0.500       | -0.243 | 0.112       | -0.164 | -0.279        | -0.078 | 0.992         | 0.991  | -0.362         | 0.062  | -0.171    | -0.161 | 0.210        | -0.179 | -0.375        | -0.283 |
|                      | <i>Thermobifida</i>   | 0.375        | 0.712  | 0.880       | 0.646  | 0.668         | 0.741  | 0.399         | 0.397  | 0.104          | 0.257  | 0.618     | 0.603  | -0.466       | -0.875 | -0.737        | -0.818 |
| proteolytics         | M                     | 1            |        |             |        |               |        |               |        |                |        |           |        |              |        |               |        |
|                      | T                     | 0.397        | 1      |             |        |               |        |               |        |                |        |           |        |              |        |               |        |
| amylolytics          | M                     | 0.112        | 0.746  | 1           |        |               |        |               |        |                |        |           |        |              |        |               |        |
|                      | T                     | 0.421        | 0.967  | 0.635       | 1      |               |        |               |        |                |        |           |        |              |        |               |        |
| cellulolytics        | M                     | 0.559        | 0.930  | 0.580       | 0.974  | 1             |        |               |        |                |        |           |        |              |        |               |        |
|                      | T                     | 0.384        | 0.978  | 0.785       | 0.971  | 0.923         | 1      |               |        |                |        |           |        |              |        |               |        |
| ligninolytics        | M                     | -0.991       | -0.399 | 0.447       | -0.564 | -0.729        | -0.325 | 1             |        |                |        |           |        |              |        |               |        |
|                      | T                     | -0.991       | -0.401 | 0.445       | -0.566 | -0.731        | -0.327 | 1.000         | 1      |                |        |           |        |              |        |               |        |
| P-solubilizing       | M                     | 0.407        | -0.172 | -0.270      | -0.093 | 0.122         | -0.221 | -0.535        | -0.533 | 1              |        |           |        |              |        |               |        |
|                      | T                     | 0.115        | -0.208 | -0.109      | -0.121 | 0.044         | -0.206 | -0.283        | -0.281 | 0.884          | 1      |           |        |              |        |               |        |
| N2-fixing            | M                     | 0.433        | 0.964  | 0.644       | 0.994  | 0.962         | 0.976  | -0.524        | -0.525 | -0.149         | -0.196 | 1         |        |              |        |               |        |
|                      | T                     | 0.410        | 0.956  | 0.605       | 0.998  | 0.968         | 0.963  | -0.577        | -0.579 | -0.110         | -0.146 | 0.996     | 1      |              |        |               |        |
| nitrifiers I         | M                     | -0.111       | -0.702 | -0.741      | -0.532 | -0.418        | -0.671 | -0.314        | -0.312 | 0.638          | 0.684  | -0.575    | -0.519 | 1            |        |               |        |
|                      | T                     | -0.319       | -0.780 | -0.914      | -0.697 | -0.632        | -0.837 | -0.361        | -0.359 | 0.351          | 0.215  | -0.707    | -0.669 | 0.738        | 1      |               |        |
| nitrifiers II        | M                     | -0.119       | -0.551 | -0.501      | -0.599 | -0.583        | -0.586 | 0.408         | 0.410  | -0.126         | -0.405 | -0.525    | -0.569 | 0.060        | 0.594  | 1             |        |
|                      | T                     | -0.066       | -0.476 | -0.836      | -0.455 | -0.472        | -0.568 | -0.665        | -0.663 | -0.103         | -0.328 | -0.454    | -0.430 | 0.282        | 0.674  | 0.509         | 1      |

Physiological groups include aerobic mesophilic (M) and thermophilic (T) microorganisms during composting.

**Table S2.** Pearson correlation (r) between community richness and diversity and physicochemical properties.

| Index           | T, °C  | w, %   | GI, %  | NI     | C      | C/N    | pH     | EC,<br>μS cm <sup>-1</sup> | CO <sub>2</sub> ,<br>vol % | NH <sub>3</sub> ,<br>mg m <sup>-3</sup> | N-NH <sub>4</sub> ,<br>mg kg <sup>-1</sup> | N-NO <sub>3</sub> ,<br>mg kg <sup>-1</sup> |
|-----------------|--------|--------|--------|--------|--------|--------|--------|----------------------------|----------------------------|-----------------------------------------|--------------------------------------------|--------------------------------------------|
| <b>Fungi</b>    |        |        |        |        |        |        |        |                            |                            |                                         |                                            |                                            |
| Chao1 index     | -0.651 | -0.758 | 0.945  | -0.369 | -0.953 | -0.878 | 0.432  | -0.794                     | -0.311                     | -0.520                                  | -0.207                                     | -0.030                                     |
| Shannon index*  | -0.313 | -0.602 | 0.703  | -0.585 | -0.779 | -0.640 | 0.281  | -0.782                     | -0.026                     | -0.451                                  | 0.060                                      | 0.126                                      |
| Simpson index   | -0.317 | 0.158  | -0.309 | 0.625  | 0.400  | 0.247  | -0.120 | 0.512                      | -0.394                     | 0.185                                   | -0.360                                     | -0.359                                     |
| <b>Bacteria</b> |        |        |        |        |        |        |        |                            |                            |                                         |                                            |                                            |
| Chao1 index     | -0.534 | -0.923 | 0.805  | -0.278 | -0.830 | -0.879 | 0.615  | -0.420                     | -0.267                     | -0.455                                  | -0.190                                     | 0.035                                      |
| Shannon index*  | -0.286 | -0.835 | 0.795  | -0.564 | -0.646 | -0.711 | 0.663  | -0.282                     | -0.070                     | -0.066                                  | -0.344                                     | 0.120                                      |
| Simpson index   | -0.286 | 0.645  | -0.577 | 0.863  | 0.450  | 0.444  | -0.321 | -0.006                     | -0.254                     | -0.330                                  | 0.388                                      | -0.300                                     |

**Table S3.** Pearson correlation (r) between dominant microbial genera and physicochemical properties.

| Genus                 | T, °C  | w, %   | GI, %  | C      | C/N    | pH     | EC,<br>μS cm <sup>-1</sup> | CO <sub>2</sub> ,<br>vol % | NH <sub>3</sub> ,<br>mg m <sup>-3</sup> | N-NH <sub>4</sub> ,<br>mg kg <sup>-1</sup> | N-NO <sub>3</sub> ,<br>mg kg <sup>-1</sup> |
|-----------------------|--------|--------|--------|--------|--------|--------|----------------------------|----------------------------|-----------------------------------------|--------------------------------------------|--------------------------------------------|
| <b>Fungi</b>          |        |        |        |        |        |        |                            |                            |                                         |                                            |                                            |
| <i>Thermomyces</i>    | -0.225 | 0.333  | 0.164  | 0.066  | 0.239  | 0.341  | -0.388                     | -0.258                     | 0.236                                   | -0.367                                     | -0.240                                     |
| <i>Penicillium</i>    | 0.909  | 0.167  | -0.619 | 0.464  | 0.459  | -0.191 | 0.487                      | 0.961                      | 0.277                                   | 0.831                                      | 0.582                                      |
| <i>Microascus</i>     | -0.615 | -0.088 | 0.629  | -0.425 | -0.256 | 0.482  | -0.735                     | -0.515                     | -0.146                                  | -0.499                                     | -0.261                                     |
| <i>Aspergillus</i>    | 0.787  | 0.395  | -0.529 | 0.513  | 0.584  | -0.088 | 0.311                      | 0.806                      | 0.446                                   | 0.574                                      | 0.454                                      |
| <i>Byssochlamys</i>   | -0.213 | 0.246  | -0.240 | 0.296  | 0.164  | -0.202 | 0.369                      | -0.467                     | 0.028                                   | -0.366                                     | -0.338                                     |
| <b>Bacteria</b>       |        |        |        |        |        |        |                            |                            |                                         |                                            |                                            |
| <i>Bacillus</i>       | 0.904  | -0.010 | -0.273 | 0.321  | 0.211  | -0.447 | 0.491                      | 0.870                      | 0.398                                   | 0.328                                      | 0.703                                      |
| <i>Aeribacillus</i>   | 0.568  | 0.180  | -0.237 | 0.238  | 0.148  | -0.508 | 0.475                      | 0.517                      | 0.806                                   | -0.077                                     | -0.099                                     |
| <i>Caldibacillus</i>  | 0.669  | -0.191 | -0.213 | 0.264  | 0.152  | 0.143  | 0.496                      | 0.862                      | 0.032                                   | 0.634                                      | 0.910                                      |
| <i>Thermobacillus</i> | 0.417  | -0.161 | -0.270 | 0.258  | 0.172  | 0.138  | 0.400                      | 0.400                      | 0.304                                   | 0.221                                      | 0.024                                      |
| <i>Streptomyces</i>   | 0.203  | -0.216 | 0.049  | 0.134  | -0.032 | 0.355  | 0.459                      | 0.391                      | 0.028                                   | 0.191                                      | 0.624                                      |
| <i>Thermobifida</i>   | -0.197 | 0.048  | 0.045  | 0.244  | 0.189  | 0.589  | 0.221                      | -0.254                     | 0.303                                   | -0.379                                     | -0.262                                     |

**Table S4.** Pearson correlation (r) between dominant microbial genera represented during composting.

| Genus                 | <i>Thermomyces</i> | <i>Penicillium</i> | <i>Microascus</i> | <i>Aspergillus</i> | <i>Byssoschlamys</i> | <i>Bacillus</i> | <i>Aeribacillus</i> | <i>Caldibacillus</i> | <i>Thermobacillus</i> | <i>Streptomyces</i> | <i>Thermobifida</i> |
|-----------------------|--------------------|--------------------|-------------------|--------------------|----------------------|-----------------|---------------------|----------------------|-----------------------|---------------------|---------------------|
| <i>Thermomyces</i>    | 1                  |                    |                   |                    |                      |                 |                     |                      |                       |                     |                     |
| <i>Penicillium</i>    | -0.137             | 1                  |                   |                    |                      |                 |                     |                      |                       |                     |                     |
| <i>Microascus</i>     | 0.862              | -0.455             | 1                 |                    |                      |                 |                     |                      |                       |                     |                     |
| <i>Aspergillus</i>    | 0.335              | 0.871              | -0.045            | 1                  |                      |                 |                     |                      |                       |                     |                     |
| <i>Byssoschlamys</i>  | -0.424             | -0.519             | -0.417            | -0.654             | 1                    |                 |                     |                      |                       |                     |                     |
| <i>Bacillus</i>       | -0.483             | 0.784              | -0.712            | 0.590              | -0.129               | 1               |                     |                      |                       |                     |                     |
| <i>Aeribacillus</i>   | -0.158             | 0.489              | -0.392            | 0.461              | -0.196               | 0.545           | 1                   |                      |                       |                     |                     |
| <i>Caldibacillus</i>  | -0.321             | 0.711              | -0.467            | 0.556              | -0.143               | 0.779           | 0.155               | 1                    |                       |                     |                     |
| <i>Thermobacillus</i> | -0.060             | 0.505              | -0.289            | 0.319              | -0.143               | 0.153           | 0.216               | 0.167                | 1                     |                     |                     |
| <i>Streptomyces</i>   | -0.269             | 0.105              | -0.277            | 0.058              | 0.216                | 0.457           | -0.016              | 0.752                | -0.197                | 1                   |                     |
| <i>Thermobifida</i>   | 0.546              | -0.275             | 0.385             | -0.057             | 0.222                | -0.379          | -0.221              | -0.153               | 0.419                 | 0.114               | 1                   |

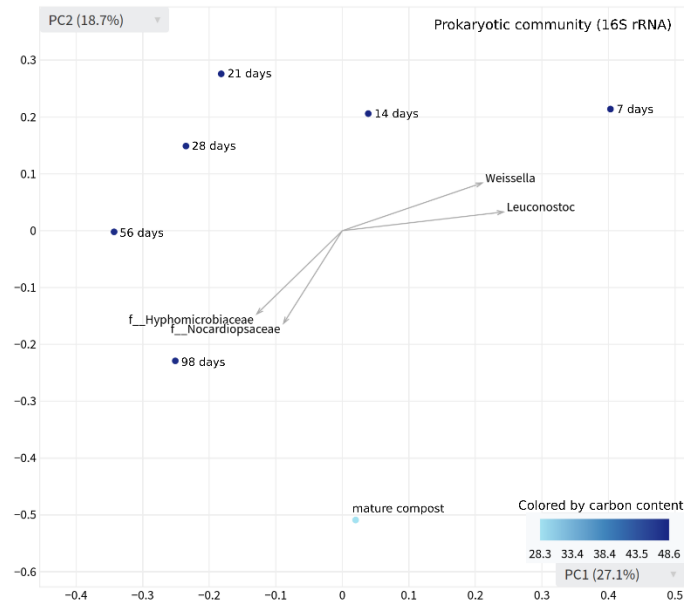

(a1)

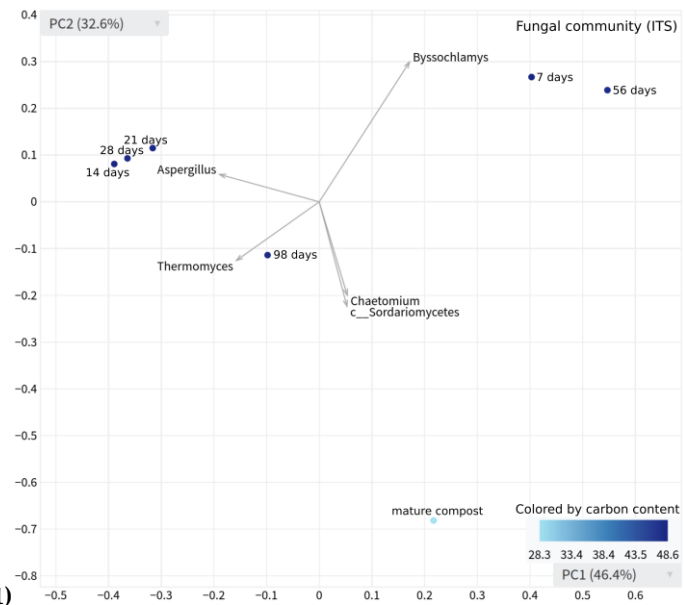

(a2)

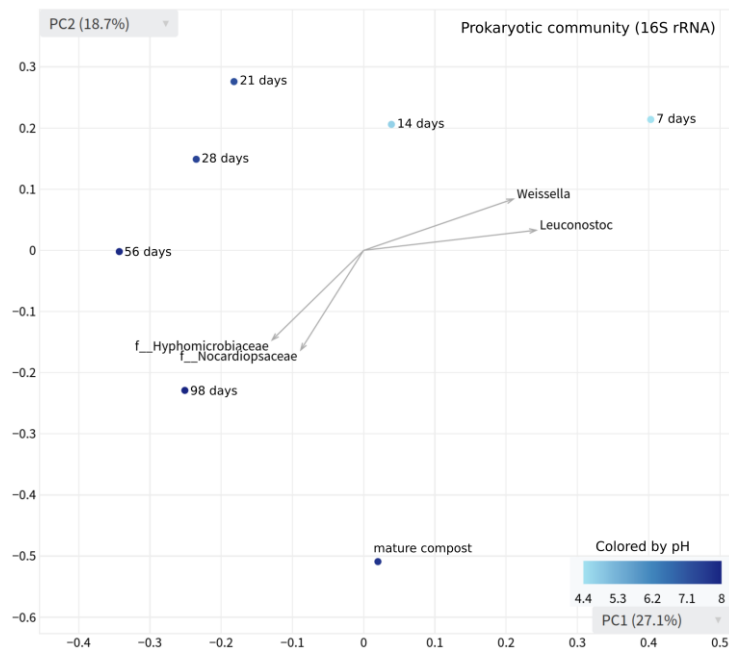

(b1)

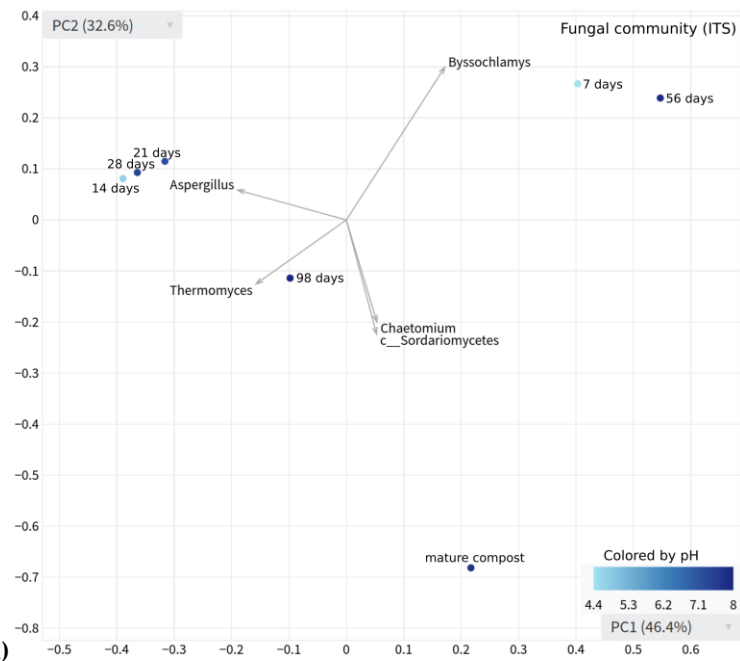

(b2)

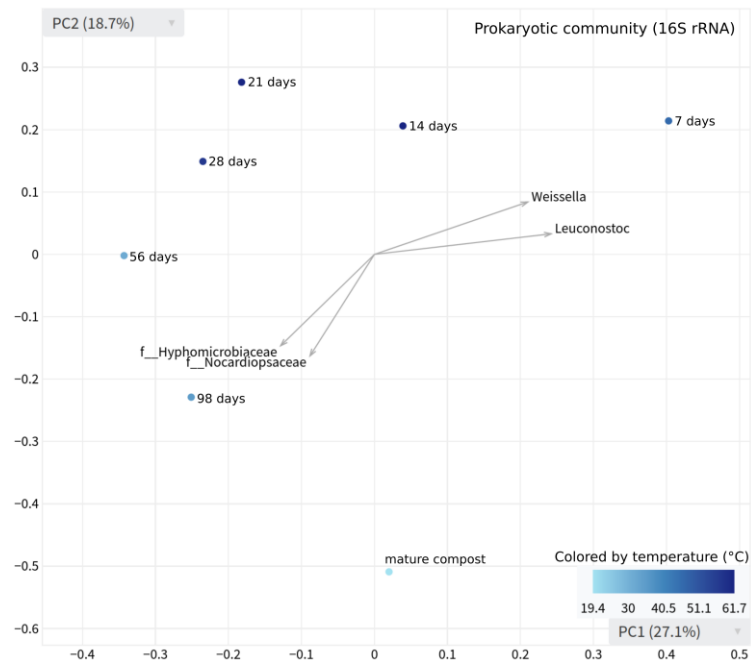

(c1)

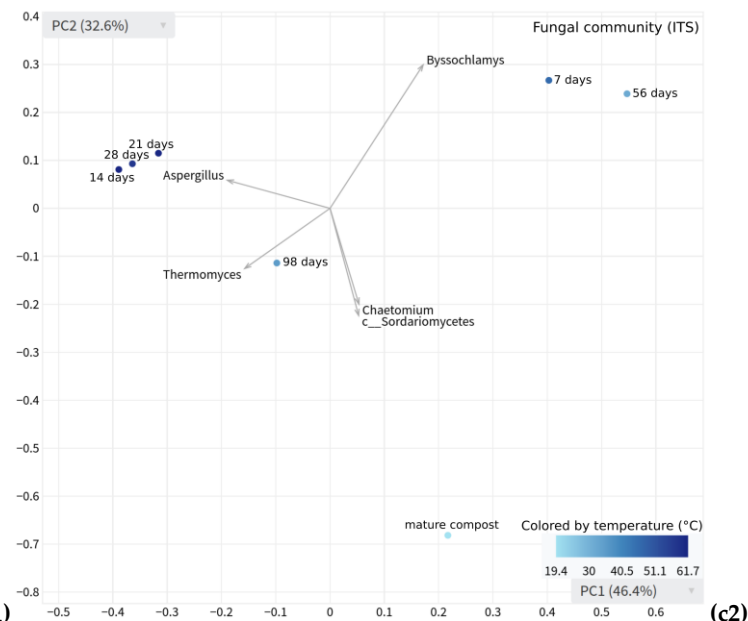

(c2)

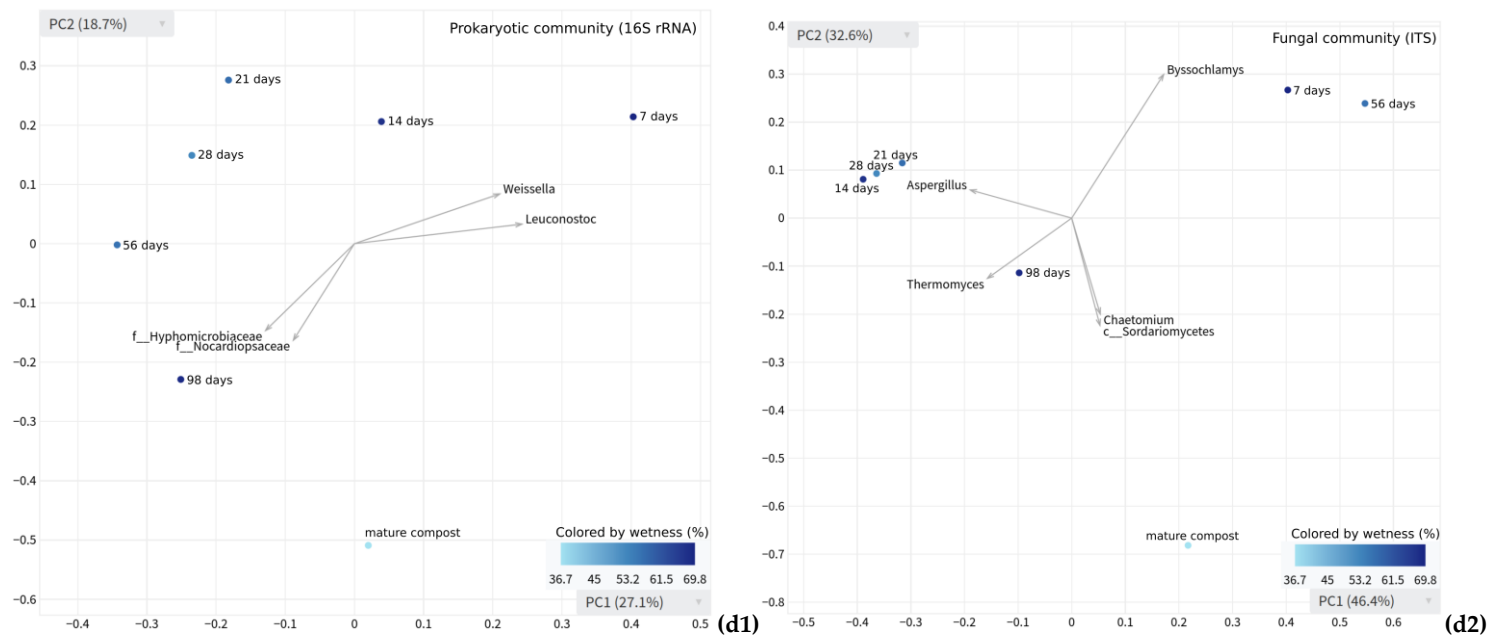

**Figure S1.** Distribution of the samples by their taxonomic composition in reduced dimensionality with the influence of ambient parameters. (PCoA): relation between carbon content, % (a); pH (b); temperature, °C (c); wetness, w% (d) and the prokaryotic (1) and fungal (2) communities throughout composting. Color of each point refers to a certain value of the parameter. The closer the samples (points) on the plot, the more similar their composition; vectors show the directions in which the levels of the respective major taxa increased.
